# Supplementary material for: Achieving stable photoluminescence by double thiacalix[4]arene-capping: the lanthanide-oxo cluster core matters
Source: Royal Society of Chemistry journal article supplement (doi:10.1039/d2ra04942b), 2022-01-01
Supplement: d2ra04942b1.pdf [file d2ra04942b1.pdf]

## Supplementary Information

### Achieving Stable Photoluminescence by Double

### Thiacalix[4]arene-Capping: the Lanthanide-Oxo Cluster Core

### Matters

Zixiu Lu,<sup>ab</sup> Shujian Wang,<sup>ab</sup> Guo-Ling Li,<sup>cd</sup> Zhu Zhuo,<sup>cd</sup> Haomiao Zhu,<sup>cd</sup>

Wei Wang,<sup>cd\*</sup> You-Gui Huang,<sup>cde\*</sup> and Maochun Hong<sup>abd</sup>

<sup>a</sup> School of Rare Earth, University of Science and Technology of China, Ganzhou, China.

<sup>b</sup> Ganjiang Innovation Academy, Chinese Academy of Sciences, Ganzhou 341000, China

<sup>c</sup> CAS Key Laboratory of Design and Assembly of Functional Nanostructures, and Fujian Provincial Key Laboratory of Nanomaterials, Fujian Institute of Research on the Structure of Matter, Chinese Academy of Sciences, China

<sup>d</sup> Xiamen Key Laboratory of Rare Earth Photoelectric Functional Materials, Xiamen Institute of Rare Earth Materials, Haixi Institutes, Chinese Academy of Sciences, Xiamen, Fujian 361021, China;

<sup>e</sup> Fujian Science & Technology Innovation Laboratory for Optoelectronic Information of China, Fuzhou, 350108

\*Corresponding author: wangwei@fjirsm.ac.cn; yghuang@fjirsm.ac.cn

## Contents

### 1. Supplementary Tables.

**Table S1.** Crystallographic Data and Structure Refinements for **1–5**.

**Table S2.** Selected bond lengths [Å] for **2** and **4**.

**Table S3.** Selected bond valence analysis for **2** and **4**.

**Table S4.** Decay analysis data of **1**, **2**, and **4**.

### 2. Supplementary Figures

**Fig. S1** (a) FTIR spectra of **1–2**; (b) FTIR spectra of **3–5**.

**Fig. S2** (a) Pyramid core  $[\text{Ln}_5(\mu_5\text{-OH})(\mu_3\text{-OH})_4]$ ; (b) Pentanuclear structure of  $\text{H}_4\text{TC4A}$ -support  $\{\text{Ln}_5\}$  cluster.

**Fig. S3** Calculated and experimental XRD patterns for **1–5**. The purple curve is the calculated one obtained from single-crystal X-ray structure analysis.

**Fig. S4** (a) Excitation spectra of **1**; (b) Excitation spectra of **2**; (c) Excitation spectra of **4**; (d) the contrasting emission spectra of **2** and **4** in the solid state at room temperature.

**Fig. S5** Decay curves of **1** (a); **2** (b); and **4** (c).

**Fig. S6** SEM images of a piece of **2** crystals after soaking in water for two weeks (a) and (b); SEM images of a piece of **4** crystals after soaking in water for two weeks (c) and (d).

**Fig. S7** (a) XRD patterns of **2** before and after soaking in water; (b) XRD patterns of **4** before and after soaking in water.

**Fig. S9** (a) The thermogravimetric (TG) analysis and differential scanning calorimetry (DSC) curve of **2**; (b) Powder XRD patterns of **2** at 100, 200, 250, and 330 °C; (c) The thermogravimetric (TG) analysis and differential scanning calorimetry (DSC) curve of **4**; (d) Powder XRD patterns of **4** at 25 and 60 °C.

## 1. Supplementary Tables.

**Table S1.** Crystallographic Data and Structure Refinements for 1–5.

|                                                                                       | 1                                                                                                                                                                                     | 2                                                                                                                                                                                      | 3                                                                                                                                                                                                     |
|---------------------------------------------------------------------------------------|---------------------------------------------------------------------------------------------------------------------------------------------------------------------------------------|----------------------------------------------------------------------------------------------------------------------------------------------------------------------------------------|-------------------------------------------------------------------------------------------------------------------------------------------------------------------------------------------------------|
| formula                                                                               | {Eu <sub>4</sub> (μ <sub>4</sub> -OH)(TC4A) <sub>2</sub> (DMF) <sub>6</sub> (CH <sub>3</sub> OH) <sub>3</sub> (HCOO)Cl <sub>2</sub> }·0.33CH <sub>3</sub> OH                          | {Tb <sub>4</sub> (μ <sub>4</sub> -OH)(TC4A) <sub>2</sub> (DMF) <sub>6</sub> (CH <sub>3</sub> OH) <sub>3</sub> (HCOO)Cl <sub>2</sub> }·0.66 CH <sub>3</sub> OH                          | {Gd <sub>9</sub> (μ <sub>5</sub> -OH) <sub>2</sub> (μ <sub>3</sub> -OH) <sub>8</sub> (CH <sub>3</sub> OH) <sub>2</sub> (TC4A) <sub>2</sub> (H <sub>2</sub> O) <sub>24</sub> Cl <sub>9</sub> }·3.36DMF |
| fw                                                                                    | 2572.80                                                                                                                                                                               | 2618.24                                                                                                                                                                                | 3759.68                                                                                                                                                                                               |
| crystal system                                                                        | Triclinic                                                                                                                                                                             | Triclinic                                                                                                                                                                              | Tetragonal                                                                                                                                                                                            |
| space group                                                                           | $P\bar{1}$                                                                                                                                                                            | $P\bar{1}$                                                                                                                                                                             | $P4/nnc$                                                                                                                                                                                              |
| <i>a</i> , Å                                                                          | 12.2472(3)                                                                                                                                                                            | 12.2571(3)                                                                                                                                                                             | 13.3613(4)                                                                                                                                                                                            |
| <i>b</i> , Å                                                                          | 20.8833(5)                                                                                                                                                                            | 20.9533(5)                                                                                                                                                                             | 13.3613(4)                                                                                                                                                                                            |
| <i>c</i> , Å                                                                          | 22.7770(5)                                                                                                                                                                            | 22.9088(6)                                                                                                                                                                             | 46.1864(17)                                                                                                                                                                                           |
| <i>α</i> , deg                                                                        | 69.3320(10)                                                                                                                                                                           | 69.3000(10)                                                                                                                                                                            | 90                                                                                                                                                                                                    |
| <i>β</i> , deg                                                                        | 83.0420(10)                                                                                                                                                                           | 83.0000(10)                                                                                                                                                                            | 90                                                                                                                                                                                                    |
| <i>γ</i> , deg                                                                        | 86.5600(10)                                                                                                                                                                           | 86.5820(10)                                                                                                                                                                            | 90                                                                                                                                                                                                    |
| <i>V</i> , Å <sup>3</sup>                                                             | 5409.5(2)                                                                                                                                                                             | 5461.9(2)                                                                                                                                                                              | 8245.4(6)                                                                                                                                                                                             |
| <i>Z</i>                                                                              | 2                                                                                                                                                                                     | 2                                                                                                                                                                                      | 2                                                                                                                                                                                                     |
| <i>D<sub>c</sub></i> / g cm <sup>-3</sup>                                             | 1.573                                                                                                                                                                                 | 1.575                                                                                                                                                                                  | 1.411                                                                                                                                                                                                 |
| <i>T</i> , K                                                                          | 200.00                                                                                                                                                                                | 200.00                                                                                                                                                                                 | 200.00                                                                                                                                                                                                |
| <i>F</i> (000)                                                                        | 2582                                                                                                                                                                                  | 2598                                                                                                                                                                                   | 3380                                                                                                                                                                                                  |
| reflections collected                                                                 | 114643                                                                                                                                                                                | 104934                                                                                                                                                                                 | 325276                                                                                                                                                                                                |
| / unique                                                                              | /24852                                                                                                                                                                                | / 22162                                                                                                                                                                                | / 4793                                                                                                                                                                                                |
| <i>R<sub>int</sub></i>                                                                | 0.0398                                                                                                                                                                                | 0.0364                                                                                                                                                                                 | 0.0611                                                                                                                                                                                                |
| GOF on <i>F</i> <sup>2</sup>                                                          | 1.159                                                                                                                                                                                 | 1.177                                                                                                                                                                                  | 1.060                                                                                                                                                                                                 |
| <i>R</i> <sub>1</sub> , <i>wR</i> <sub>2</sub> <i>I</i> > 2σ( <i>I</i> ) <sup>a</sup> | 0.0350, 0.0975                                                                                                                                                                        | 0.0351, 0.1001                                                                                                                                                                         | 0.0454, 0.1267                                                                                                                                                                                        |
| <i>R</i> <sub>1</sub> , <i>wR</i> <sub>2</sub> (all data)                             | 0.0427, 0.1098                                                                                                                                                                        | 0.0415, 0.1120                                                                                                                                                                         | 0.0537, 0.1350                                                                                                                                                                                        |
|                                                                                       | 4                                                                                                                                                                                     | 5                                                                                                                                                                                      |                                                                                                                                                                                                       |
| formula                                                                               | {Tb <sub>9</sub> (μ <sub>5</sub> -OH) <sub>2</sub> (μ <sub>3</sub> -OH) <sub>8</sub> (OCH <sub>3</sub> )(TC4A) <sub>2</sub> (H <sub>2</sub> O) <sub>24</sub> Cl <sub>9</sub> }·2.6DMF | {Tb <sub>9</sub> (μ <sub>5</sub> -OH) <sub>2</sub> (μ <sub>3</sub> -OH) <sub>8</sub> (OCH <sub>3</sub> )(TC4A) <sub>2</sub> (H <sub>2</sub> O) <sub>24</sub> Cl <sub>9</sub> }·5.36DMF |                                                                                                                                                                                                       |

|                                                                                       |                 |                 |
|---------------------------------------------------------------------------------------|-----------------|-----------------|
| fw                                                                                    | 3703.03         | 3722.45         |
| crystal system                                                                        | Tetragonal      | Tetragonal      |
| space group                                                                           | <i>P4/nnc</i>   | <i>P4/nnc</i>   |
| <i>a</i> , Å                                                                          | 13.3479(4)      | 13.2526(4)      |
| <i>b</i> , Å                                                                          | 13.3479(4)      | 13.2526(4)      |
| <i>c</i> , Å                                                                          | 46.0809(18)     | 46.0114(19)     |
| $\alpha$ , deg                                                                        | 90              | 90              |
| $\beta$ , deg                                                                         | 90              | 90              |
| $\gamma$ , deg                                                                        | 90              | 90              |
| <i>V</i> , Å <sup>3</sup>                                                             | 8210.1(6)       | 8081.0(6)       |
| <i>Z</i>                                                                              | 2               | 2               |
| <i>D<sub>c</sub></i> / g cm <sup>-3</sup>                                             | 1.423           | 1.459           |
| <i>T</i> , K                                                                          | 200.00          | 200.00          |
| <i>F</i> (000)                                                                        | 3398            | 3416            |
| Reflectionscollected/<br>unique                                                       | 102383<br>/4747 | 322222<br>/4681 |
| <i>R<sub>int</sub></i>                                                                | 0.0566          | 0.0590          |
| GOF on <i>F</i> <sup>2</sup>                                                          | 1.107           | 1.058           |
| <i>R</i> <sub>1</sub> , <i>wR</i> <sub>2</sub> <i>I</i> > 2σ( <i>I</i> ) <sup>a</sup> | 0.0628, 0.1582  | 0.0498, 0.1338  |
| <i>R</i> <sub>1</sub> , <i>wR</i> <sub>2</sub> (all data)                             | 0.0787, 0.1731  | 0.0572, 0.1411  |

<sup>[a]</sup> $R_1 = \sum ||F_o| - |F|| / \sum |F_o|$  and  $wR_2 = [\sum w(F_o^2 - F_c^2)^2 / \sum wF_o^4]^{1/2}$  for  $F_o^2 > 2\sigma(F_o^2)$

**Table S2.** Selected bond lengths [Å] for **2** and **4**.

| 2             |            |               |            |
|---------------|------------|---------------|------------|
| Tb(1)-Cl(2)   | 2.7288(14) | Tb(3)-O(4)    | 2.368(3)   |
| Tb(1)-S(5)    | 2.9516(13) | Tb(3)-O(6)#1  | 2.376(3)   |
| Tb(1)-S(7)#2  | 2.9416(13) | Tb(3)-O(8)#1  | 2.373(3)   |
| Tb(1)-O(3)#2  | 2.374(3)   | Tb(3)-O(10)   | 2.366(3)   |
| Tb(1)-O(7)    | 2.5438(2)  | Tb(3)-O(12)   | 2.416(4)   |
| Tb(1)-O(11)#2 | 2.377(3)   | Tb(3)-O(14)   | 2.4740(2)  |
| Tb(1)-O(13)   | 2.414(3)   | Tb(3)-O(16)   | 2.376(4)   |
| Tb(1)-O(18)   | 2.378(3)   | Tb(4)-Cl(1)   | 2.7474(15) |
| Tb(1)-O(19)   | 2.422(4)   | Tb(4)-S(1)#1  | 2.9330(12) |
| Tb(2)-S(2)#2  | 2.9416(13) | Tb(4)-S(4)    | 2.9364(13) |
| Tb(2)-S(3)    | 2.9551(13) | Tb(4)-O(1)    | 2.336(4)   |
| Tb(2)-O(3)    | 2.385(3)   | Tb(4)-O(4)    | 2.410(3)   |
| Tb(2)-O(5)    | 2.343(4)   | Tb(4)-O(6)    | 2.379(3)   |
| Tb(2)-O(7)    | 2.5582(2)  | Tb(4)-O(8)#1  | 2.397(3)   |
| Tb(2)-O(11)#2 | 2.385(3)   | Tb(4)-O(10)#1 | 2.389(3)   |

|               |            |               |           |
|---------------|------------|---------------|-----------|
| Tb(2)-O(13)   | 2.371(3)   | Tb(4)-O(14)   | 2.6205(2) |
| Tb(2)-O(15)   | 2.398(4)   | Tb(1)-Tb(2)   | 3.6144(3) |
| Tb(2)-O(18)#2 | 2.386(3)   | Tb(1)-Tb(2)#2 | 3.6010(3) |
| Tb(3)-S(6)    | 2.9547(12) | Tb(3)-Tb(4)   | 3.5983(3) |
| Tb(3)-S(8)#1  | 2.9762(12) | Tb(3)-Tb(4)#1 | 3.6094(3) |
| <b>4</b>      |            |               |           |
| Tb(1)-O(6)#2  | 2.426(6)   | Tb(2)-O(2)#1  | 2.404(7)  |
| Tb(1)-O(6)#3  | 2.426(6)   | Tb(2)-O(3)    | 2.402(10) |
| Tb(1)-O(6)#4  | 2.426(6)   | Tb(2)-O(4)    | 2.414(9)  |
| Tb(1)-O(6)#1  | 2.426(6)   | Tb(2)-O(5)    | 2.494(7)  |
| Tb(1)-O(6)#5  | 2.426(6)   | Tb(2)-O(6)    | 2.324(5)  |
| Tb(1)-O(6)#6  | 2.426(6)   | Tb(2)-O(6)#5  | 2.342(6)  |
| Tb(1)-O(6)#7  | 2.426(6)   | Tb(2)-O(7)    | 2.5554(7) |
| Tb(1)-O(6)    | 2.426(6)   | Tb(1)-Tb(2)#1 | 3.7367(4) |
| Tb(1)-O(7)    | 2.874(10)  | Tb(1)-Tb(2)   | 3.7366(4) |
| Tb(1)-O(7)#2  | 2.874(10)  | Tb(2)-Tb(2)#5 | 3.6081(6) |
| Tb(2)-S(1)#1  | 2.965(2)   | Tb(2)-Tb(2)#1 | 3.6081(6) |
| Tb(2)-O(2)    | 2.384(6)   |               |           |

Symmetry transformations used to generate equivalent atoms:

**2:** #1  $-x+2, -y+2, -z+1$  #2  $-x+1, -y+1, -z+2$

**4:** #1  $-y+3/2, X, z$  #2  $-x+3/2, y, -z+1/2$  #3  $x, -y+3/2, -z+1/2$  #4  $-y+3/2, -x+3/2, -z+1/2$  #5  $y, x, -z+1/2$  #6  $y, x, z+1/2$  #7  $-x+3/2, -y+3/2, z$

**Table S3.** Selected bond valence analysis for **2** and **4**.

| <b>2</b>      |      |      |      |      |      |      |      |      |      |      |                 |
|---------------|------|------|------|------|------|------|------|------|------|------|-----------------|
| Atom          | Cl2  | S5   | S7   | O3   | O7   | O11  | O13  | O18  | O19  | —    | $\Sigma$ cation |
| Tb1           | 0.44 | 0.30 | 0.31 | 0.38 | 0.24 | 0.37 | 0.34 | 0.37 | 0.33 | —    | 3.09            |
| Atom          | S2   | S3   | O3   | O5   | O7   | O11  | O13  | O15  | O18  | —    | $\Sigma$ cation |
| Tb2           | 0.31 | 0.30 | 0.37 | 0.41 | 0.23 | 0.36 | 0.38 | 0.35 | 0.36 | —    | 3.08            |
| Atom          | S6   | S8   | O4   | O6   | O8   | O10  | O12  | O14  | O16  | —    | $\Sigma$ cation |
| Tb3           | 0.30 | 0.28 | 0.38 | 0.37 | 0.38 | 0.38 | 0.34 | 0.29 | 0.38 | —    | 3.11            |
| Atom          | Cl1  | S1   | S4   | O1   | O4   | O6   | O8   | O10  | O14  | —    | $\Sigma$ cation |
| Tb3           | 0.42 | 0.32 | 0.32 | 0.42 | 0.34 | 0.37 | 0.35 | 0.36 | 0.19 | —    | 3.10            |
| Atom          | Tb1  | Tb1  | Tb2  | Tb   | —    | —    | —    | —    | —    | —    | $\Sigma$ ion    |
| O7            | 0.24 | 0.24 | 0.23 | 0.23 | —    | —    | —    | —    | —    | —    | 0.94            |
| Atom          | Tb1  | Tb1  | Tb2  | Tb   | —    | —    | —    | —    | —    | —    | $\Sigma$ ion    |
| O14           | 0.29 | 0.29 | 0.19 | 0.19 | —    | —    | —    | —    | —    | —    | 0.97            |
| <b>4</b>      |      |      |      |      |      |      |      |      |      |      |                 |
| Atom          | O7   | O7   | O6   | $\Sigma$ cation |
| Tb1           | 0.10 | 0.10 | 0.35 | 0.35 | 0.35 | 0.35 | 0.35 | 0.35 | 0.35 | 0.35 | 3.00            |
| Atom          | S1   | O2   | O2   | O3   | O4   | O5   | O5   | O6   | O7   | —    | $\Sigma$ cation |
| Tb2           | 0.28 | 0.39 | 0.37 | 0.37 | 0.36 | 0.39 | 0.45 | 0.43 | 0.24 | —    | 3.08            |
| Atom          | Tb1  | Tb2  | Tb2  | —    | —    | —    | —    | —    | —    | —    | $\Sigma$ ion    |
| O6( $\mu_3$ ) | 0.45 | 0.43 | 0.34 | —    | —    | —    | —    | —    | —    | —    | 1.22            |
| Atom          | Tb1  | Tb2  | Tb2  | Tb2  | Tb2  | —    | —    | —    | —    | —    | $\Sigma$ ion    |
| O5( $\mu_5$ ) | 0.10 | 0.23 | 0.23 | 0.23 | 0.23 | —    | —    | —    | —    | —    | 1.02            |

The bond valence was calculated by the equation:  $S = \exp((R_0 - R)/b)$  where where  $S$  is

the experimental bond valence,  $R$  the observed bond length, and  $R_0$  and  $b$  are fitted bond valence parameters.  $R_0$  of Tb–O, Tb–S are 2.032, 2.510 and  $b = 0.37$ .

**Table S4.** Decay analysis data of **1**, **2**, and **4**.

| Compound | Corresponding lifetime |                   | Contributing amplitude |       | Average decay            |
|----------|------------------------|-------------------|------------------------|-------|--------------------------|
|          | lifetime (ns)          |                   |                        |       | time (ns) <sup>[a]</sup> |
|          | $\tau_1$               | $\tau_2$          | $A_1$                  | $A_2$ | $\tau^*$                 |
| <b>1</b> | $6.36 \cdot 10^4$      | $2.59 \cdot 10^5$ | 0.49                   | 0.52  | $5.22 \cdot 10^4$        |
| <b>2</b> | $4.98 \cdot 10^5$      | $1.36 \cdot 10^6$ | 0.07                   | 1.04  | $1.34 \cdot 10^6$        |
| <b>4</b> | $4.92 \cdot 10^5$      | $1.01 \cdot 10^6$ | 0.03                   | 0.75  | $1.00 \cdot 10^6$        |

<sup>[a]</sup>  $\tau^* = (A_1\tau_1^2 + A_2\tau_2^2)/(A_1\tau_1 + A_2\tau_2)$

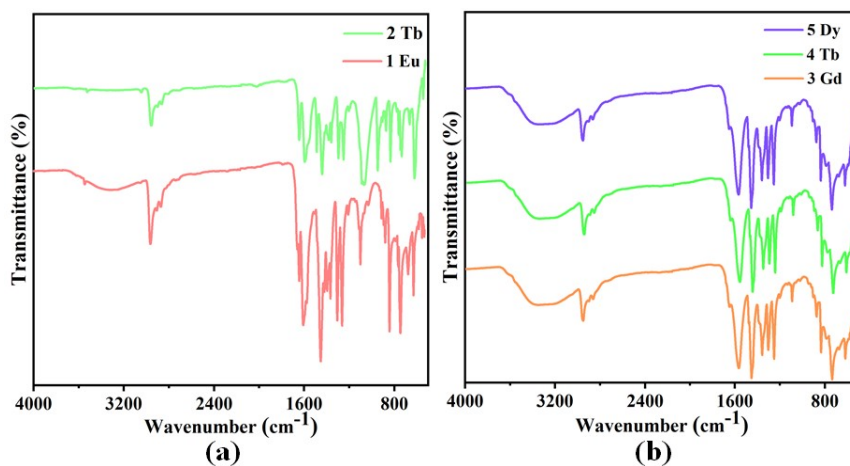

**Fig. S1** (a) FTIR spectra of **1–2**; (b) FTIR spectra of **3–5**.

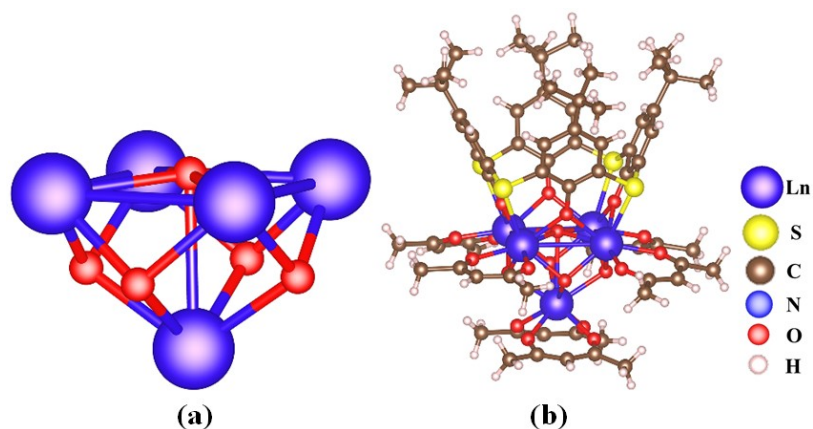

**Fig. S2** (a) Pyramid core  $[\text{Ln}_5(\mu_5\text{-O})(\mu_3\text{-O})_4]$ ; (b) Pentanuclear structure of  $\text{H}_4\text{TC4A}$ -support  $\{\text{Ln}_5\}$  cluster.

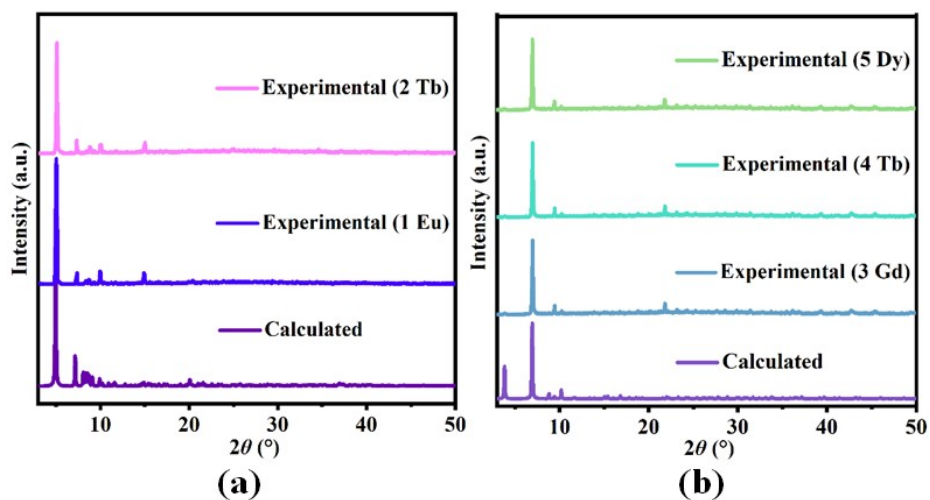

**Fig. S3** Calculated and experimental XRD patterns for 1–5. The purple curve is the calculated one obtained from single-crystal X-ray structure analysis.

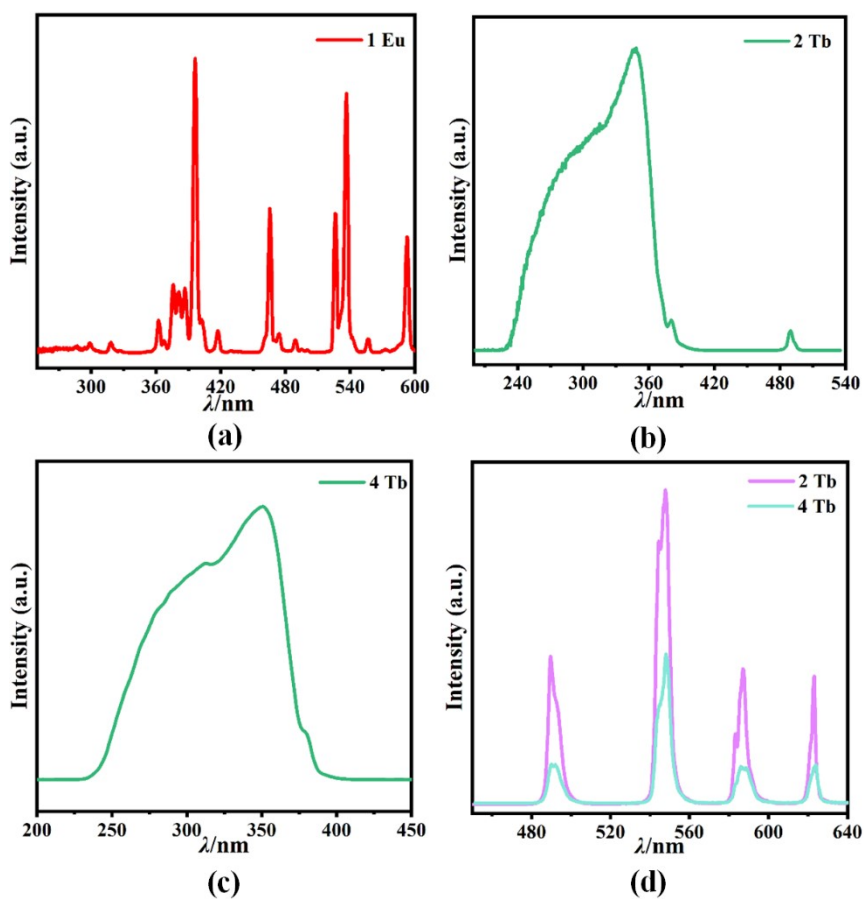

**Fig. S4** (a) Excitation spectra of **1**; (b) Excitation spectra of **2**; (c) Excitation spectra of **4**; (d) the contrasting emission spectra of **2** and **4** in the solid state at room temperature.



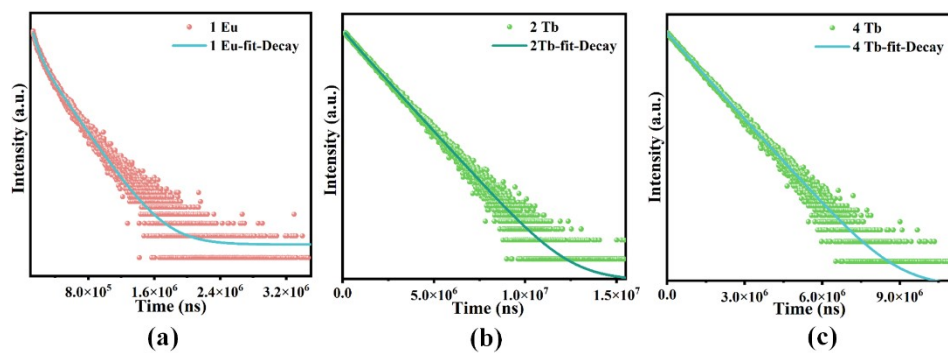

**Fig. S5** Decay curves of **1** (a), **2** (b), and **4** (c).

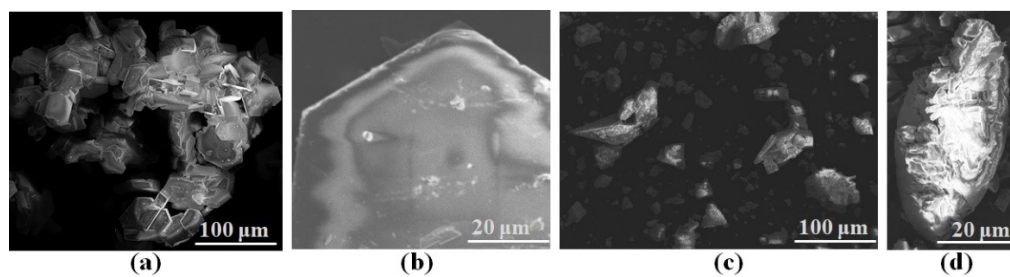

**Fig. S6** SEM images of a piece of **2** crystals after soaking in water for two weeks (a) and (b); SEM images of a piece of **4** crystals after soaking in water for two weeks (c) and (d).

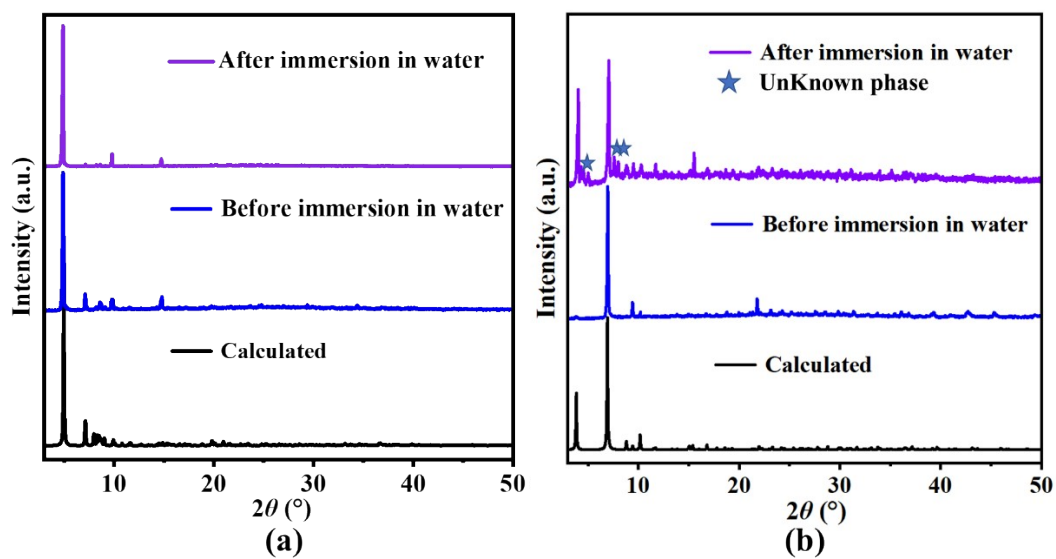

**Fig. S7** (a) XRD patterns of **2** before and after soaking in water; (b) XRD patterns of **4** before and after soaking in water.

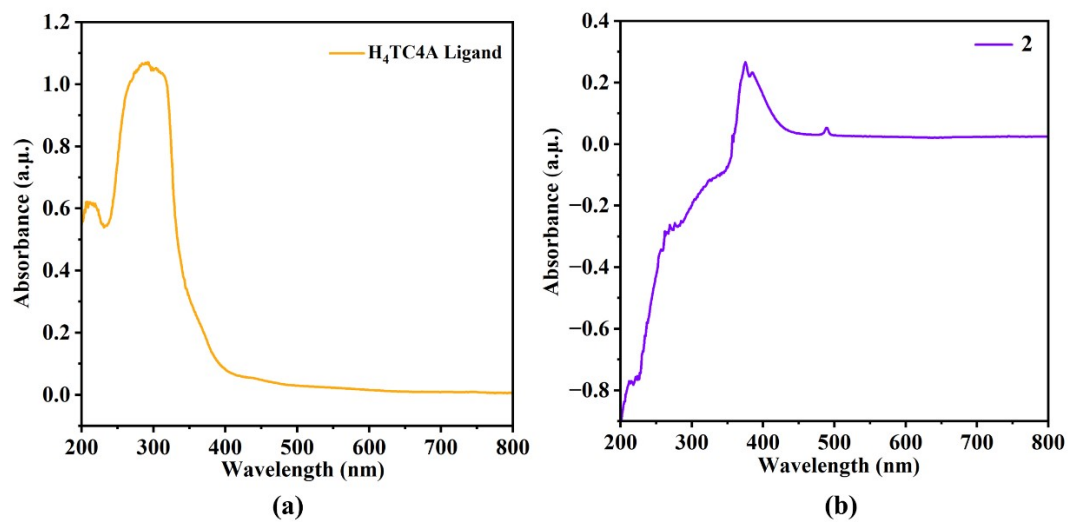

**Fig. S8** (a) Absorption spectra of H<sub>4</sub>TC4A ligand; (b) Absorption spectra of **2**.

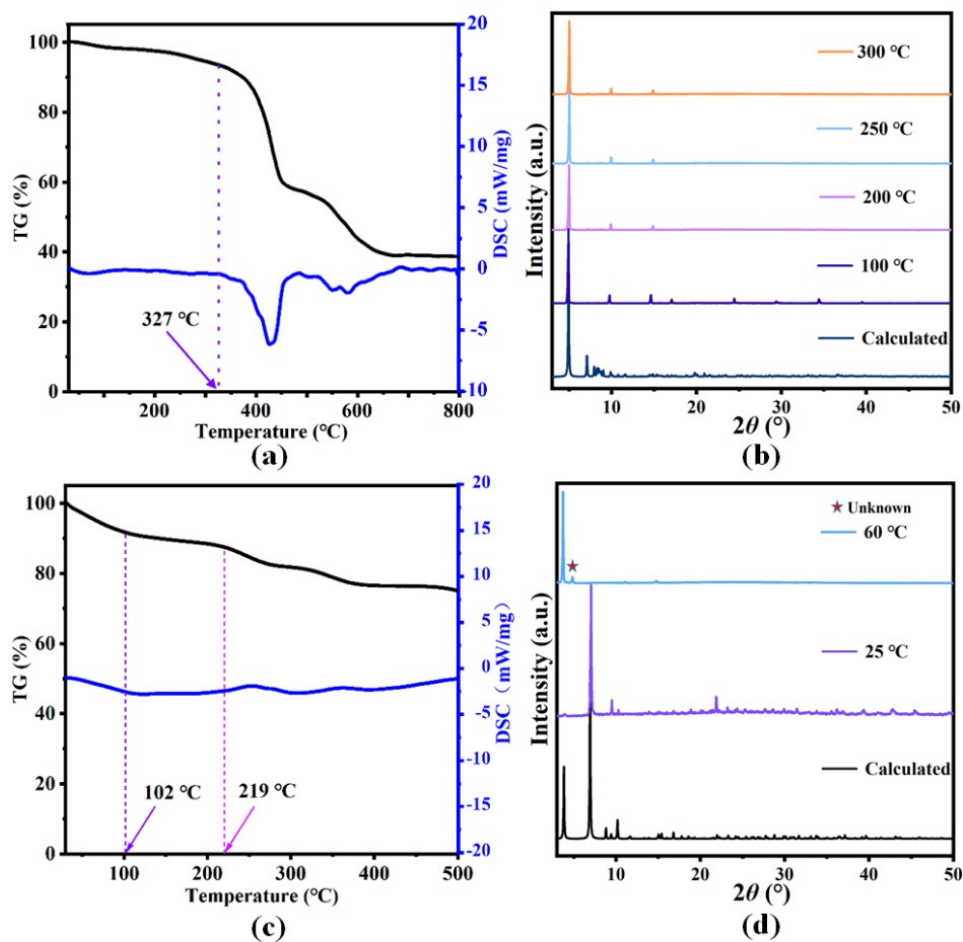

**Fig. S9** (a) The thermogravimetric (TG) analysis and differential scanning calorimetry (DSC) curve of **2**; (b) Powder XRD patterns of **2** at 100, 200, 250, and 300 °C; (c) The thermogravimetric (TG) analysis and differential scanning calorimetry (DSC) curve of **4**; (d) Powder XRD patterns of **4** at 25 and 60 °C.
